# Supplementary material for: A new upgraded high-precision gridded precipitation dataset considering spatiotemporal and physical correlations for mainland China
Source: Copernicus journal article supplement (doi:10.5194/essd-2025-20), 2025-02-12
Supplement: Supplementary file 1 [file essd-2025-20-supplement.pdf]

*Supporting Information for*

**A new upgraded high-precision gridded precipitation dataset considering spatiotemporal and physical correlations for mainland China**

**Contents of this file**

Tables S1 to S6.

**Introduction**

Here we provide supporting information on other gridded precipitation datasets used for comparison and the accuracy information for precipitation values and precipitation events in the paper, “A new upgraded high-precision gridded precipitation dataset considering spatiotemporal and physical correlations for mainland China”

**Table S1.** Gridded precipitation dataset used for comparison.

| <b>Dataset Name</b> | <b>Data Generation Methods</b> | <b>Spatial Resolution</b> | <b>Temporal Resolution</b> | <b>Data Availability Time Range</b> |
|---------------------|--------------------------------|---------------------------|----------------------------|-------------------------------------|
| CHM_PRE V1          | Gauge-based<br>Interpolation   | 0.10°                     | 1d                         | 1961–2022                           |
| GSMaP V8            | Remote Sensing                 | 0.10°                     | 1h                         | 1998–Present                        |
| PERSIANN-CDR        | Remote Sensing                 | 0.25°                     | 1d                         | 1983–Present                        |
| GLDAS_Noah025 V2.1  | Data Assimilation              | 0.25°                     | 3h                         | 2000–Present                        |
| IMERG Final L3 V7   | Remote Sensing                 | 0.10°                     | 1d                         | 2000.06–Present                     |

**Table S2.** Contingency table for comparing the precipitation and no-precipitation events detected by gauge and products.

| <b>Threshold</b>                       | <b>Product<math>\geq</math>threshold</b> | <b>Product<math>&lt;</math>threshold</b> |
|----------------------------------------|------------------------------------------|------------------------------------------|
| <b>Gauge<math>\geq</math>threshold</b> | Hits (TP)                                | Misses (FN)                              |
| <b>Gauge<math>&lt;</math>threshold</b> | False alarms (FP)                        | Correct negatives (TN)                   |

**Table S3.** Precipitation accuracy of different datasets validated by high-density gauge data. The bolded numbers in the column represent the optimal accuracy values for that metric.

| <b>Dataset Name</b> | <b>MAE (mm/day)</b> | <b>KGE</b>  | <b>Bias</b> | <b>RSD</b>  |
|---------------------|---------------------|-------------|-------------|-------------|
| CHM_PRE V2          | <b>1.48</b>         | <b>0.79</b> | 1.05        | <b>0.88</b> |
| CHM_PRE V1          | 1.67                | 0.70        | 1.12        | 0.78        |
| GSMaP               | 2.94                | 0.48        | <b>1.04</b> | 0.80        |
| IMERG               | 3.27                | 0.44        | 1.12        | 0.84        |
| PERSIANN-CDR        | 3.70                | 0.29        | 1.12        | 0.70        |
| GLDAS               | 3.69                | 0.31        | 1.04        | 0.79        |

**Table S4.** Precipitation accuracy validated by high-density gauge data in different regions. The bolded numbers in the column represent the optimal accuracy values for that metric.

| Region Abbreviation | Dataset Name | MAE (mm/day) | KGE         | Bias        | RSD         |
|---------------------|--------------|--------------|-------------|-------------|-------------|
| NEC                 | CHM_PRE V2   | <b>1.00</b>  | <b>0.63</b> | <b>1.19</b> | <b>0.79</b> |
|                     | CHM_PRE V1   | 1.06         | 0.58        | 1.23        | 0.73        |
|                     | GSMaP        | 1.74         | 0.42        | 1.12        | 0.77        |
|                     | GLDAS        | 2.21         | 0.15        | 1.25        | 0.55        |
|                     | PERSIANN-CDR | 2.35         | 0.10        | 1.35        | 0.54        |
|                     | IMERG        | 2.08         | 0.29        | 1.32        | 0.76        |
| NC                  | CHM_PRE V2   | <b>0.85</b>  | <b>0.76</b> | <b>1.11</b> | <b>0.85</b> |
|                     | CHM_PRE V1   | 0.97         | 0.66        | 1.16        | 0.75        |
|                     | GSMaP        | 1.87         | 0.42        | 1.12        | 0.75        |
|                     | PERSIANN-CDR | 2.41         | 0.15        | 1.24        | 0.53        |
|                     | IMERG        | 2.11         | 0.33        | 1.22        | 0.73        |
|                     | GLDAS        | 2.37         | 0.22        | 1.14        | 0.66        |
| SCC                 | CHM_PRE V2   | <b>1.94</b>  | <b>0.80</b> | 1.04        | <b>0.90</b> |
|                     | CHM_PRE V1   | 2.21         | 0.71        | 1.11        | 0.79        |
|                     | GSMaP        | 3.92         | 0.48        | 1.03        | 0.80        |
|                     | IMERG        | 4.35         | 0.45        | 1.10        | 0.86        |
|                     | PERSIANN-CDR | 4.88         | 0.32        | 1.09        | 0.73        |
|                     | GLDAS        | 4.89         | 0.33        | <b>1.01</b> | 0.82        |
| SWC                 | CHM_PRE V2   | <b>1.92</b>  | <b>0.69</b> | 0.96        | 0.85        |
|                     | CHM_PRE V1   | 2.06         | 0.64        | 1.07        | 0.78        |
|                     | GSMaP        | 3.03         | 0.41        | 0.92        | 0.82        |
|                     | IMERG        | 3.39         | 0.38        | <b>1.02</b> | <b>0.89</b> |
|                     | PERSIANN-CDR | 3.87         | 0.23        | 1.03        | 0.78        |
|                     | GLDAS        | 4.03         | 0.23        | 1.05        | 0.87        |
| IM                  | CHM_PRE V2   | <b>0.57</b>  | <b>0.71</b> | 1.15        | <b>0.85</b> |
|                     | CHM_PRE V1   | 0.61         | 0.65        | 1.18        | 0.78        |
|                     | GSMaP        | 1.12         | 0.41        | <b>1.11</b> | 0.83        |
|                     | PERSIANN-CDR | 1.43         | 0.14        | 1.27        | 0.56        |
|                     | IMERG        | 1.26         | 0.32        | 1.26        | 0.78        |
|                     | GLDAS        | 1.45         | 0.16        | 1.27        | 0.65        |
| NWC                 | CHM_PRE V2   | <b>0.47</b>  | <b>0.56</b> | 1.12        | 0.73        |
|                     | CHM_PRE V1   | 0.52         | 0.49        | 1.18        | 0.66        |
|                     | GSMaP        | 0.71         | 0.33        | <b>0.96</b> | <b>0.81</b> |
|                     | PERSIANN-CDR | 0.96         | -0.02       | 1.26        | 0.41        |
|                     | IMERG        | 0.82         | 0.21        | 1.15        | 0.67        |
|                     | GLDAS        | 0.91         | 0.09        | 1.07        | 0.64        |
| QT                  | CHM_PRE V2   | <b>1.18</b>  | <b>0.71</b> | <b>1.02</b> | 0.84        |
|                     | CHM_PRE V1   | 1.27         | 0.66        | 1.11        | 0.79        |
|                     | GSMaP        | 2.17         | 0.37        | 1.01        | 0.81        |

---

|              |      |      |      |             |
|--------------|------|------|------|-------------|
| IMERG        | 2.35 | 0.34 | 1.03 | 0.93        |
| PERSIANN-CDR | 2.91 | 0.15 | 1.35 | 0.73        |
| GLDAS        | 2.82 | 0.23 | 1.14 | <b>0.95</b> |

---

**Table S5.** Precipitation event accuracy of different datasets validated by high-density gauge data. The bolded numbers in the column represent the optimal accuracy values for that metric.

| <b>Dataset Name</b> | <b>HSS</b>  | <b>F1 Score</b> | <b>Accuracy</b> | <b>POD</b>  | <b>FAR</b>  |
|---------------------|-------------|-----------------|-----------------|-------------|-------------|
| CHM_PRE V2          | <b>0.68</b> | <b>0.80</b>     | <b>0.85</b>     | 0.84        | <b>0.24</b> |
| CHM_PRE V1          | 0.58        | 0.75            | 0.79            | <b>0.93</b> | 0.37        |
| GSMaP               | 0.50        | 0.67            | 0.78            | 0.65        | 0.31        |
| IMERG               | 0.39        | 0.62            | 0.71            | 0.69        | 0.43        |
| PERSIANN-CDR        | 0.21        | 0.54            | 0.59            | 0.70        | 0.55        |
| GLDAS               | 0.29        | 0.54            | 0.68            | 0.55        | 0.47        |

**Table S6.** Precipitation event accuracy validated by high-density gauge data in different regions. The bolded numbers in the column represent the optimal accuracy values for that metric.

| <b>Region Abbreviation</b> | <b>Dataset Name</b> | <b>HSS</b>  | <b>F1 Score</b> | <b>Accuracy</b> | <b>POD</b>  | <b>FAR</b>  |
|----------------------------|---------------------|-------------|-----------------|-----------------|-------------|-------------|
| NEC                        | CHM_PRE V2          | <b>0.61</b> | <b>0.72</b>     | <b>0.84</b>     | 0.84        | <b>0.37</b> |
|                            | CHM_PRE V1          | 0.54        | 0.68            | 0.79            | <b>0.90</b> | 0.45        |
|                            | GSMaP               | 0.49        | 0.62            | 0.81            | 0.63        | 0.39        |
|                            | IMERG               | 0.38        | 0.56            | 0.74            | 0.68        | 0.53        |
|                            | GLDAS               | 0.37        | 0.55            | 0.73            | 0.69        | 0.54        |
|                            | PERSIANN-CDR        | 0.16        | 0.45            | 0.54            | 0.78        | 0.68        |
| NC                         | CHM_PRE V2          | <b>0.67</b> | <b>0.74</b>     | <b>0.88</b>     | 0.80        | <b>0.30</b> |
|                            | CHM_PRE V1          | 0.55        | 0.67            | 0.81            | <b>0.90</b> | 0.46        |
|                            | GSMaP               | 0.47        | 0.59            | 0.82            | 0.61        | 0.44        |
|                            | IMERG               | 0.34        | 0.51            | 0.73            | 0.67        | 0.58        |
|                            | GLDAS               | 0.27        | 0.45            | 0.72            | 0.55        | 0.61        |
|                            | PERSIANN-CDR        | 0.16        | 0.42            | 0.54            | 0.78        | 0.71        |
| SCC                        | CHM_PRE V2          | <b>0.68</b> | <b>0.83</b>     | <b>0.84</b>     | 0.84        | <b>0.19</b> |
|                            | CHM_PRE V1          | 0.56        | 0.79            | 0.77            | <b>0.94</b> | 0.32        |
|                            | GSMaP               | 0.47        | 0.69            | 0.74            | 0.66        | 0.27        |
|                            | IMERG               | 0.37        | 0.66            | 0.68            | 0.68        | 0.36        |
|                            | GLDAS               | 0.25        | 0.56            | 0.63            | 0.53        | 0.40        |
|                            | PERSIANN-CDR        | 0.24        | 0.61            | 0.62            | 0.67        | 0.44        |
| SWC                        | CHM_PRE V2          | <b>0.67</b> | <b>0.81</b>     | <b>0.84</b>     | 0.85        | <b>0.23</b> |
|                            | CHM_PRE V1          | 0.58        | 0.77            | 0.78            | <b>0.94</b> | 0.35        |
|                            | GSMaP               | 0.54        | 0.71            | 0.78            | 0.69        | 0.26        |
|                            | IMERG               | 0.47        | 0.69            | 0.74            | 0.74        | 0.35        |
|                            | PERSIANN-CDR        | 0.39        | 0.65            | 0.70            | 0.70        | 0.40        |
|                            | GLDAS               | 0.37        | 0.62            | 0.70            | 0.63        | 0.39        |
| IM                         | CHM_PRE V2          | <b>0.66</b> | <b>0.73</b>     | <b>0.89</b>     | 0.82        | <b>0.35</b> |
|                            | CHM_PRE V1          | 0.59        | 0.68            | 0.85            | <b>0.90</b> | 0.45        |
|                            | GSMaP               | 0.48        | 0.57            | 0.85            | 0.58        | 0.43        |
|                            | IMERG               | 0.38        | 0.51            | 0.79            | 0.61        | 0.56        |
|                            | GLDAS               | 0.32        | 0.47            | 0.76            | 0.58        | 0.61        |
|                            | PERSIANN-CDR        | 0.20        | 0.41            | 0.61            | 0.77        | 0.72        |
| NWC                        | CHM_PRE V2          | <b>0.52</b> | <b>0.61</b>     | 0.85            | 0.80        | 0.51        |
|                            | CHM_PRE V1          | 0.45        | 0.56            | 0.79            | <b>0.89</b> | 0.59        |
|                            | GSMaP               | 0.41        | 0.50            | <b>0.85</b>     | 0.51        | <b>0.51</b> |
|                            | IMERG               | 0.31        | 0.44            | 0.76            | 0.65        | 0.67        |
|                            | GLDAS               | 0.21        | 0.36            | 0.75            | 0.48        | 0.71        |
|                            | PERSIANN-CDR        | 0.12        | 0.32            | 0.53            | 0.78        | 0.80        |
| QT                         | CHM_PRE V2          | <b>0.61</b> | <b>0.77</b>     | <b>0.81</b>     | 0.88        | <b>0.32</b> |
|                            | CHM_PRE V1          | 0.55        | 0.75            | 0.77            | <b>0.94</b> | 0.38        |

---

|              |      |      |      |      |      |
|--------------|------|------|------|------|------|
| GSMaP        | 0.51 | 0.69 | 0.77 | 0.69 | 0.32 |
| IMERG        | 0.41 | 0.65 | 0.71 | 0.74 | 0.42 |
| GLDAS        | 0.33 | 0.57 | 0.69 | 0.56 | 0.42 |
| PERSIANN-CDR | 0.19 | 0.57 | 0.56 | 0.82 | 0.56 |

---
